# Supplementary material for: Long-Term Dynamics of Mangrove Vegetation Coverages in Indonesia’s National Parks Derived from Remote Sensing Data
Source: Research Square preprint supplement (doi:10.21203/rs.3.rs-7554686/v1), 2025-10-16
Supplement: Supplementary file 1 [file 254e3c018bebca3e86cb096e.docx]

**Supplementary Material 1**. The total areas of mangrove ecosystem in each National Parks of Indonesia

|  | **National Park** | **Mangrove Area (Ha)** |
| --- | --- | --- |
| 1 | Lorentz (LRZ) | 195100.9697 |
| 2 | Sembilang (SBG) | 86430.7881 |
| 3 | Wasur (WSR) | 7352.19006 |
| 4 | Kepulauan Togean (KTG) | 6315.18139 |
| 5 | Rawa Aopa Watumohai (RAW) | 6159.54804 |
| 6 | Kutai (KTI) | 3971.09918 |
| 7 | Gunung Maras (GMS) | 2915.52194 |
| 8 | Tanjung Puting (TJP) | 2872.5074 |
| 9 | Teluk Cenderawasih (TLC) | 1957.93814 |
| 10 | Ujung Kulon (UJK) | 1913.20666 |
| 11 | Bunaken (BNK) | 1491.85313 |
| 12 | Komodo (KMD) | 966.38384 |
| 13 | Way Kambas (WKB) | 844.24982 |
| 14 | Alas Purwo (APW) | 842.38857 |
| 15 | Wakatobi (WKT) | 838.29286 |
| 16 | Bali Barat (BLB) | 480.46683 |
| 17 | Kepulauan Karimunjawa (KRJ) | 457.01451 |
| 18 | Gunung Palung (GNP) | 308.63129 |
| 19 | Baluran (BLR) | 294.09761 |
| 20 | Manusela (MNS) | 288.31422 |
| 21 | Siberut (SBR) | 132.67255 |
| 22 | Berbak (BRB) | 64.96462 |
| 23 | Kepulauan Seribu (KPS) | 31.94438 |

**Supplementary Material 2.** The trend calculation of NDVI in each National Parks

| 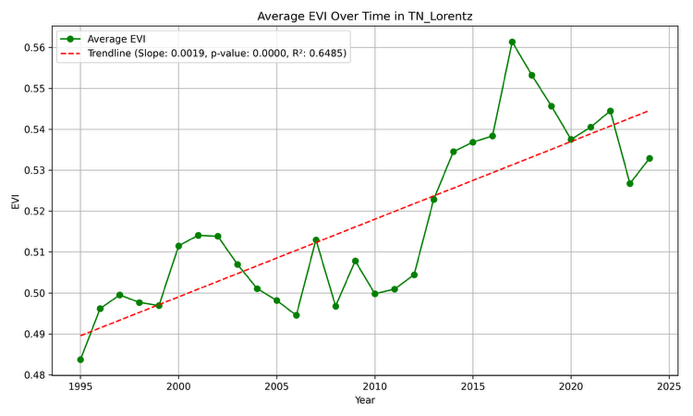 | 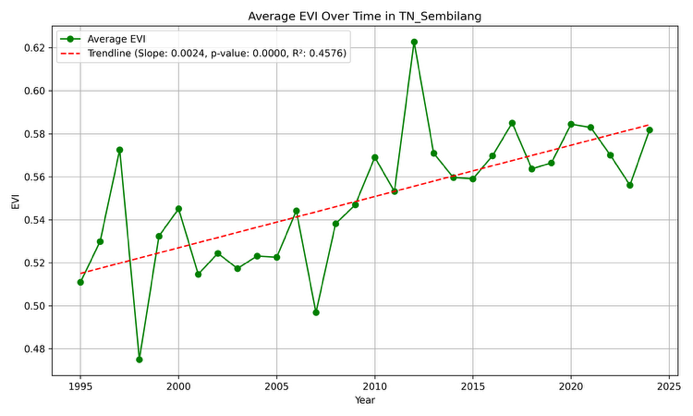 |
| --- | --- |
| 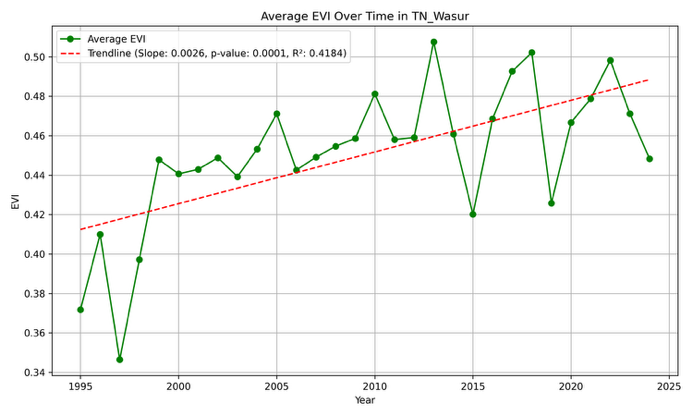 | 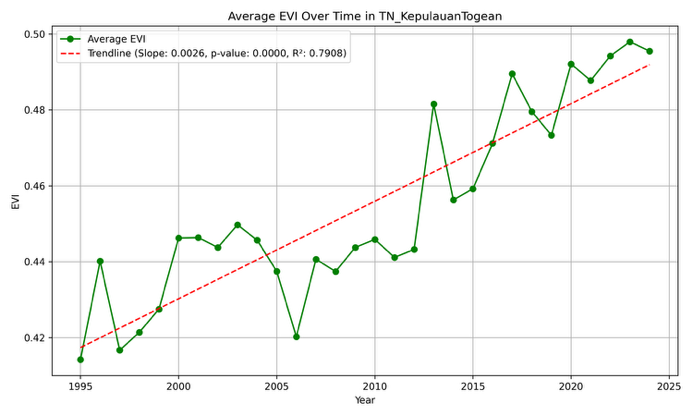 |
| 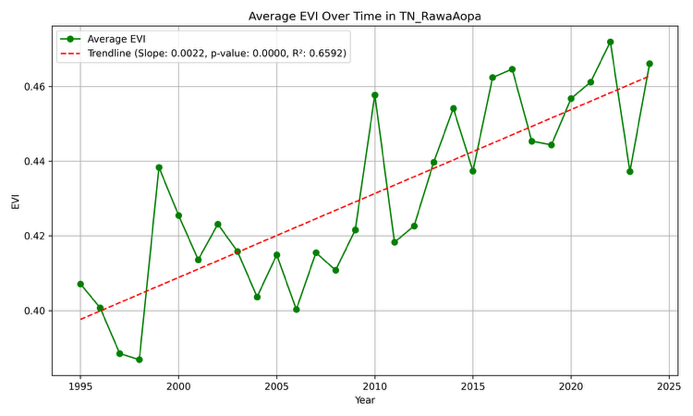 | 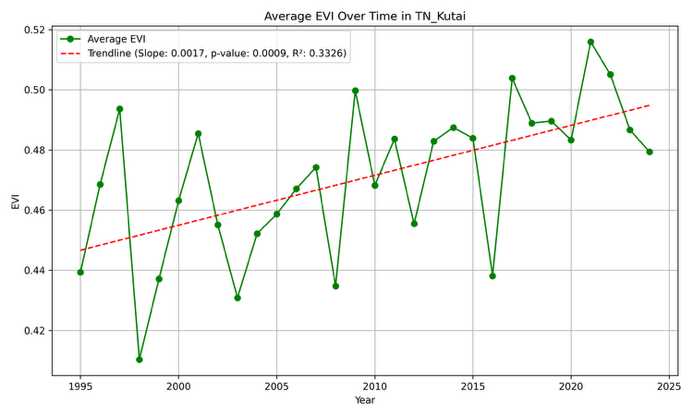 |
| 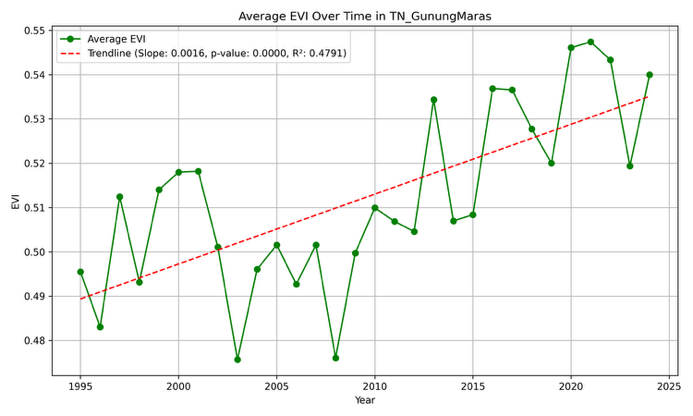 | 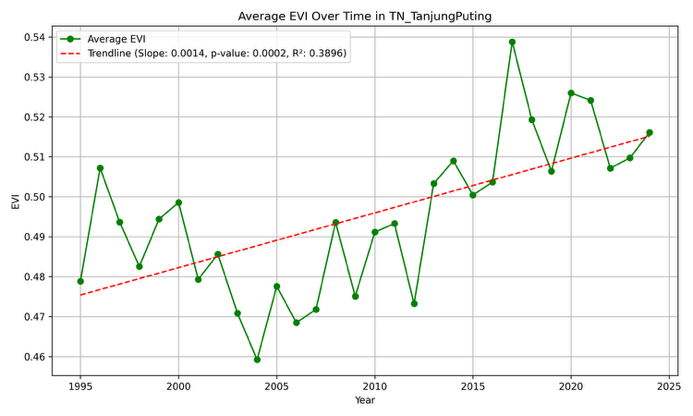 |
| 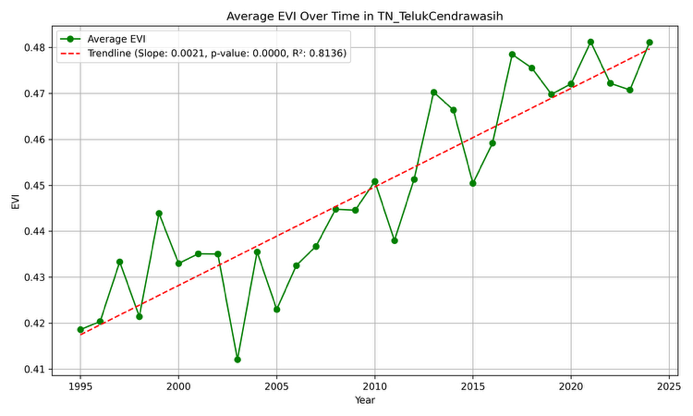 | 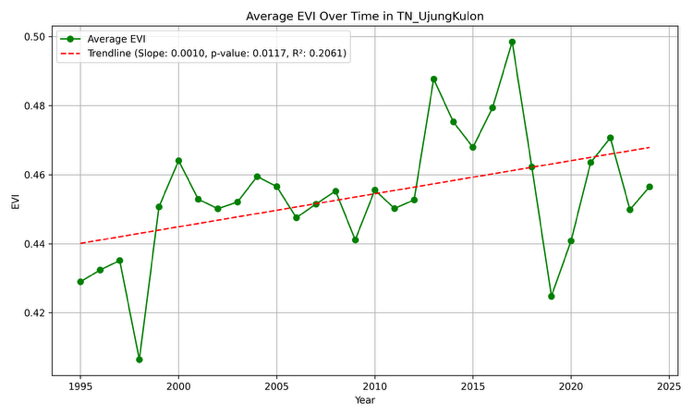 |
| 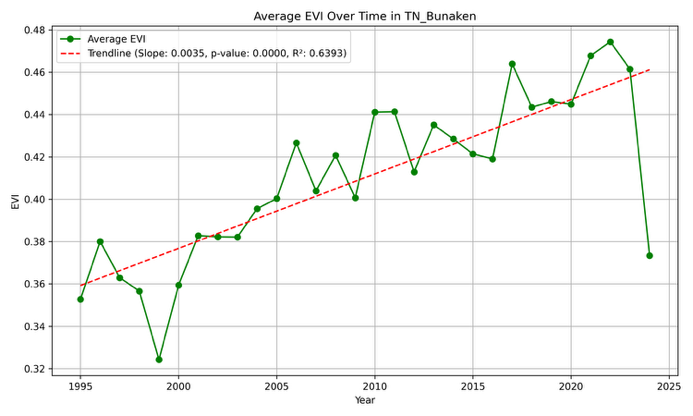 | 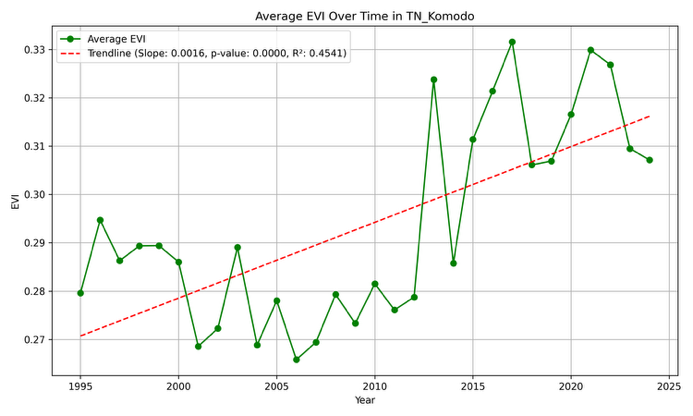 |
| 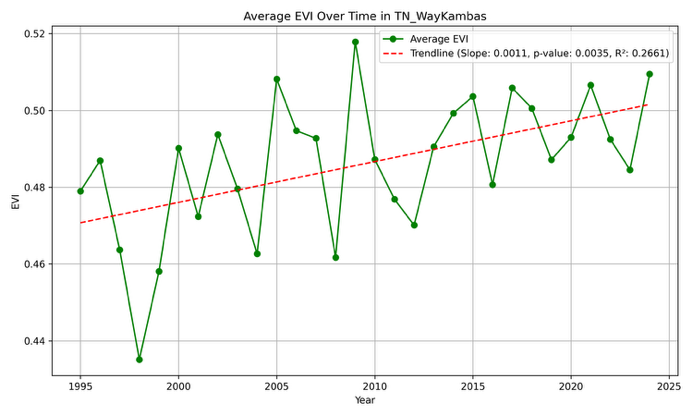 | 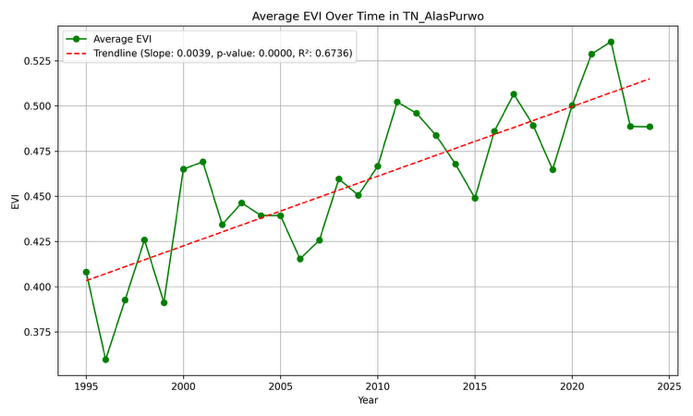 |
| 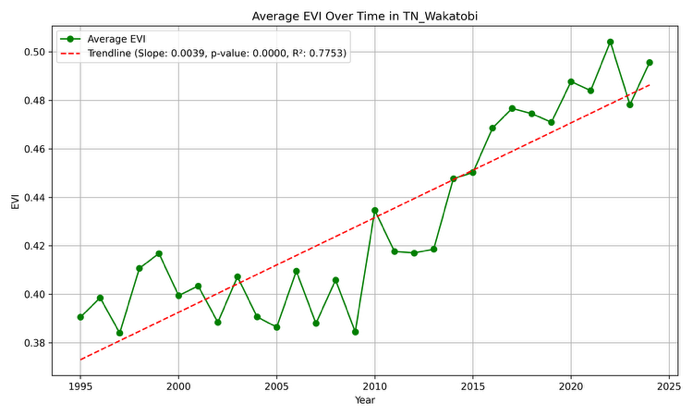 | 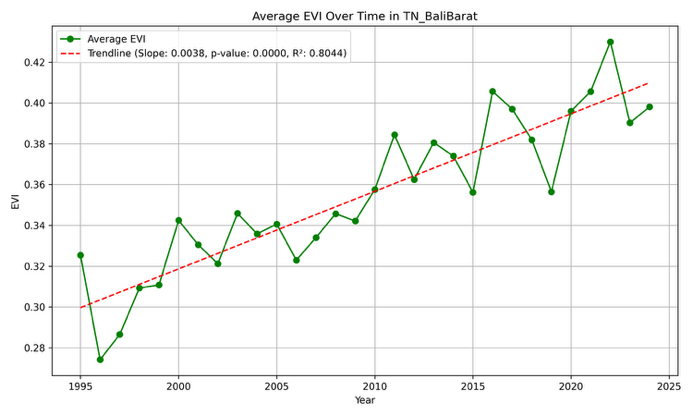 |
| 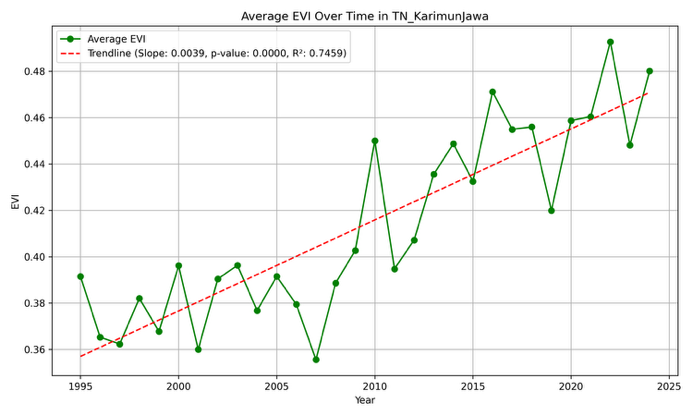 | 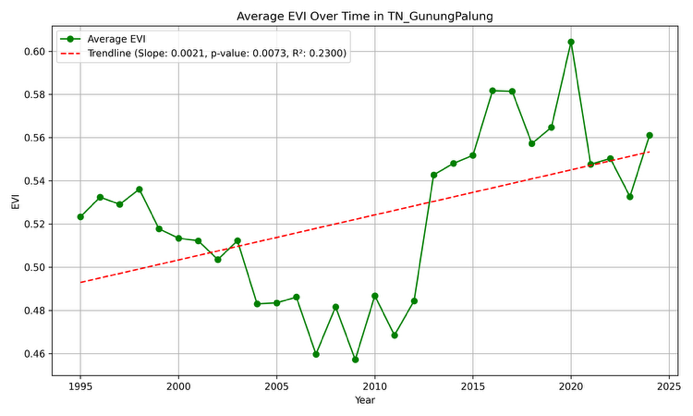 |
| 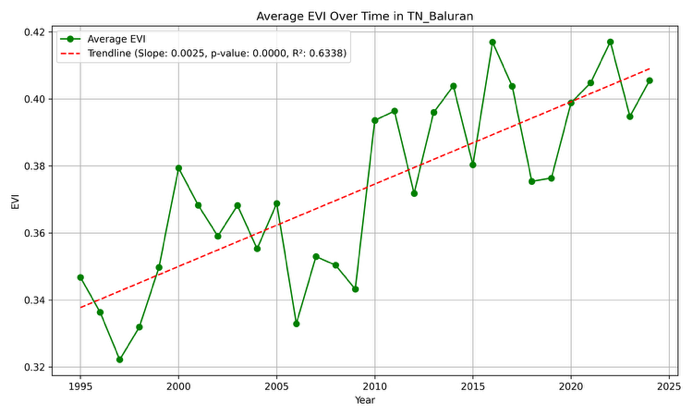 | 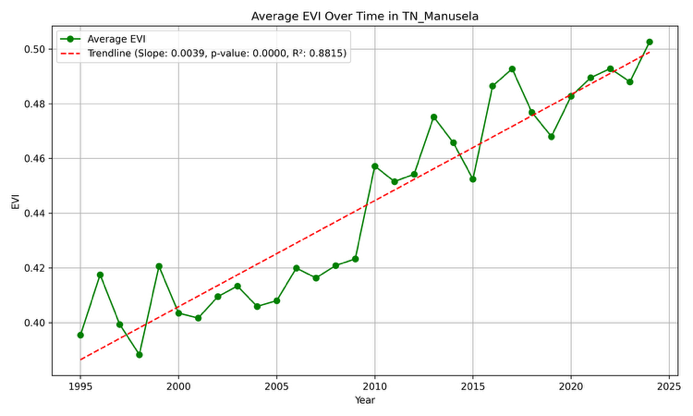 |
| 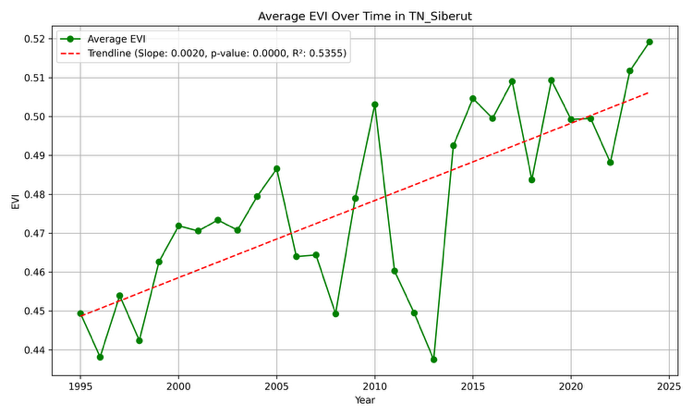 | 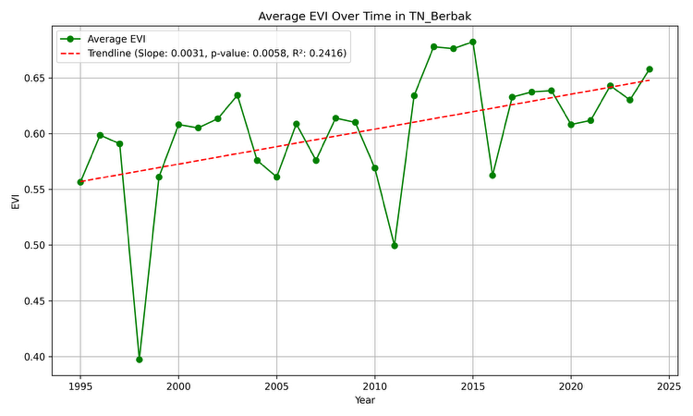 |
| 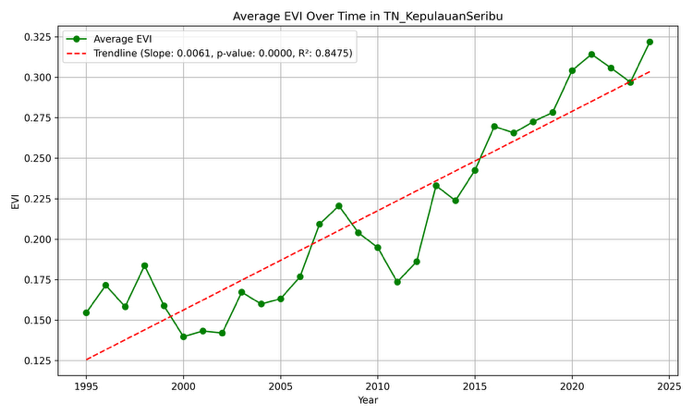 |  |

**Supplementary Material 3**

Table of area changes in each National Park based on Global Mangrove Wacth Data

| **National Park** | **Area Changes (1996-2020) (ha)** |
| --- | --- |
| TN Lorentz | 596.699 |
| TN Sembilang | -989.75 |
| TN Wasur | -11.934 |
| TN Kepulauan Togean | 79.144 |
| TN Rawa Aopa Watumohai | -150.621 |
| TN Kutai | -260.04 |
| TN Gunung Maras | -78.348 |
| TN Tanjung Puting | -85.567 |
| TN Teluk Cenderawasih | 13.736 |
| TN Ujung Kulon | 13.478 |
| TN Bunaken | -20.825 |
| TN Komodo | -113.966 |
| TN Way Kambas | -23.8 |
| TN Alas Purwo | 144.45 |
| TN Wakatobi | -20.767 |
| TN Bali Barat | 48.495 |
| TN Karimunjawa | 24.441 |
| TN Gunung Palung | NaN |
| TN Baluran | 19.08 |
| TN Manusela | -22.344 |
| TN Siberut | -0.972 |
| TN Berbak | NaN |
| TN Kepulauan Seribu | NaN |
